# Supplementary material for: Revascularization of ischemic tissues by PlGF treatment, and inhibition of tumor angiogenesis, arthritis and atherosclerosis by anti-Flt1
Source: Springer Nature journal article supplement (doi:10.1038/nm731), 2002-07-01
Supplement: 41591_2002_BFnm731_MOESM2_ESM.pdf [file 41591_2002_BFnm731_MOESM2_ESM.pdf]

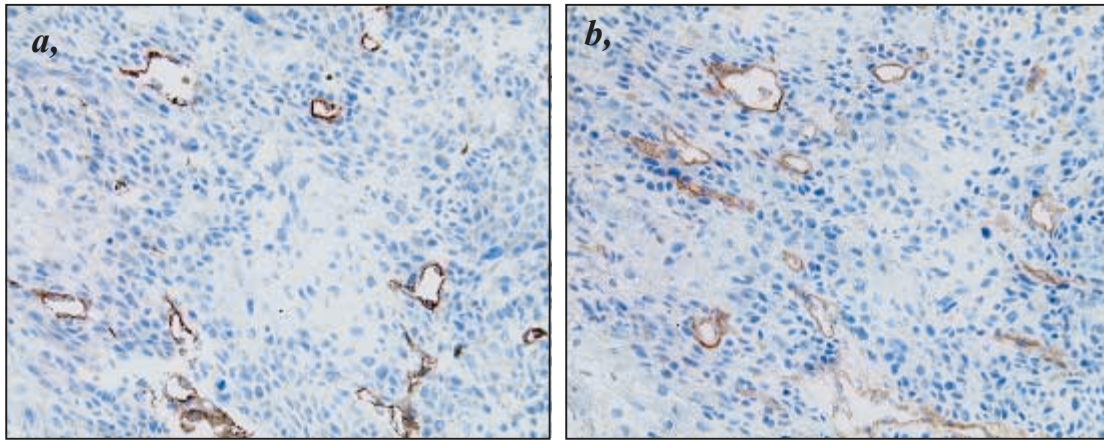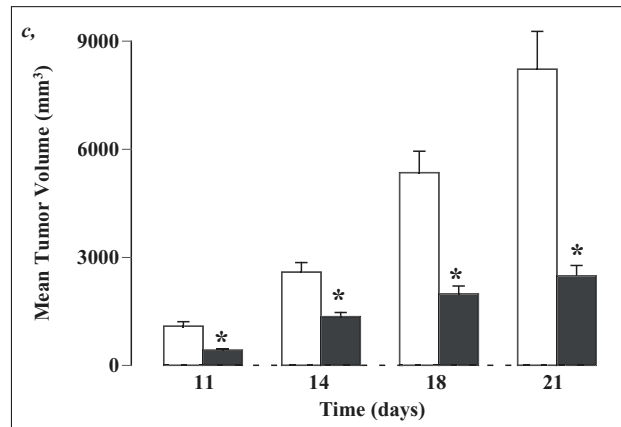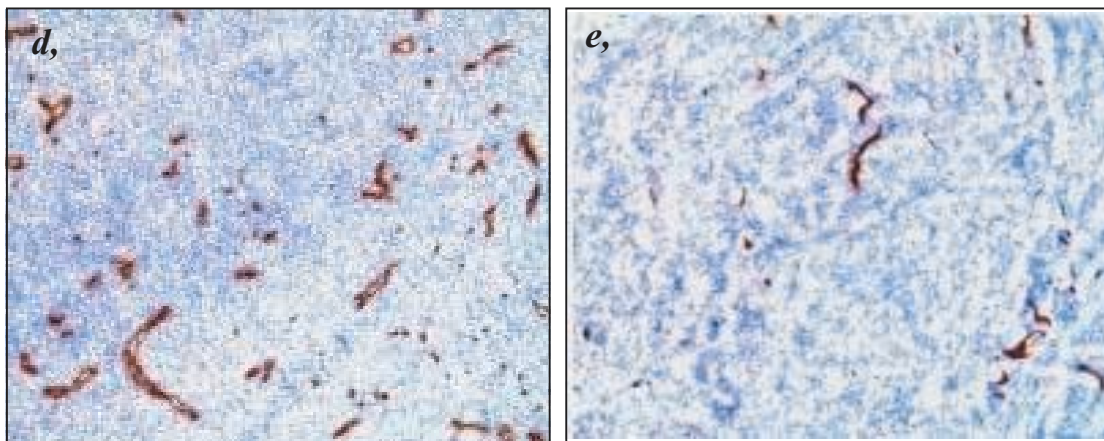

Supplementary Fig. B Flt1 is expressed on epidermoid tumor vessels and anti-Flt1 inhibits growth and vascularization of VEGF or PIGF-overexpressing rat C6 gliomas. Anti-Flt1 in some figure panels is indicated by 'MF1'. a and b, Immunostaining for Flt1 revealing expression of Flt1 on endothelium of vessels in A431 epidermoid tumors, but not on tumor cells a. b, Shows an adjacent CD31 stained section. c, Graph showing volumes of PIGF-overexpressing tumors (mean  $\pm$  s.e.m., n = 12) of mice treated with PBS (white) or anti-Flt1 (black). After 3 wk, anti-Flt1 treatment reduced tumor volume 4-fold as compared with control mice. Anti-Flt also reduced volumes of VEGF-overexpressing rat C6 gliomas (data not shown). d and e, CD31 staining revealing reduced vessel density in PIGF-overexpressing tumors grown in anti-Flt1-treated mice (e) as compared with control mice (d). In addition, vessels were significantly smaller in anti-Flt1-treated mice. Similar results were obtained with VEGF-overexpressing tumors (data not shown). Methods: VEGF or PIGF-transduced rat C6 gliomas were established by injecting the tumor cells into athymic nude mice subcutaneously in the right flank. 3 d after tumor engraftment, randomized groups of mice received intraperitoneal injection of anti-Flt1 at a dose of 1 mg every 3 d or PBS.
