# Supplementary material for: Revascularization of ischemic tissues by PlGF treatment, and inhibition of tumor angiogenesis, arthritis and atherosclerosis by anti-Flt1
Source: Springer Nature journal article supplement (doi:10.1038/nm731), 2002-07-01
Supplement: 41591_2002_BFnm731_MOESM3_ESM.pdf [file 41591_2002_BFnm731_MOESM3_ESM.pdf]

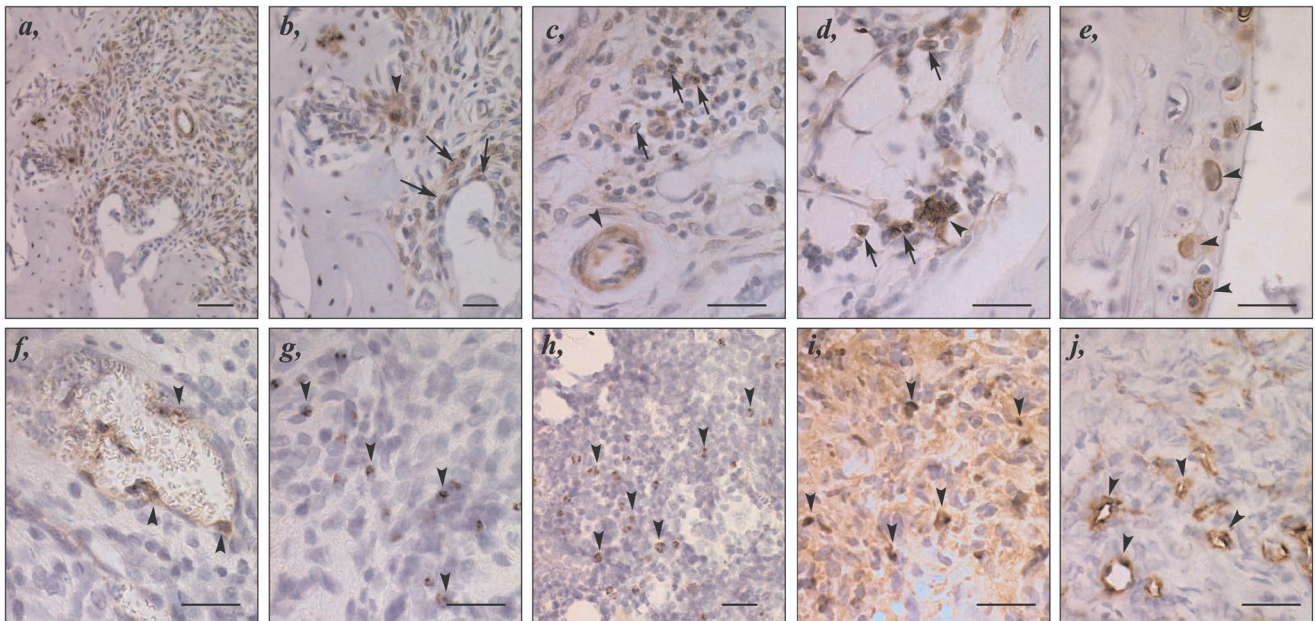

Supplementary Fig. C: Expression of Flt1, Flk1, PlGF and VEGF in inflamed arthritic joints. a–e, Immunostaining revealing that VEGF was highly expressed in rheumatoid synovium (a). VEGF was detected on spindle-shaped cells (likely synoviocytes; arrows in b) and multinucleated cells (likely osteoclasts; arrowhead in b) at the pannus–bone interface. In addition, VEGF was present on endothelial cells lining synovial neovessels (arrowhead in c) and on inflammatory cell clusters in the vicinity of these vessels (arrows in c). Some cells in the bone marrow expressed VEGF (arrows in d). Note the strong expression in a multinucleated osteoclast (arrowhead in d). Finally, VEGF was strongly expressed on chondrocytes (arrowheads in e). f–h, PlGF was also expressed in arthritic synovium, in particular on endothelial cells of synovial neovessels (arrowheads in f), some cells in the inflammatory infiltrate (arrowheads in g) and in the bone marrow (arrowheads in h). i and j, Flt1 was expressed on inflammatory cells (arrowheads in i) in the inflamed synovium and on synovial vessels, whereas Flk1 expression was restricted to synovial neovessels (arrowheads in j). Scale bars, 50 mm in (a), 25 mm in (b–j).
